# Supplementary material
Source: ML conference proceedings conference paper supplement (https://openreview.net/forum?id=pHckxhmBlI)
Supplement: supplementary_material [file Link_dataset.pdf › Supp/Link_dataset.pdf]

The link for the dataset:

<https://drive.google.com/file/d/1pBeibxvzAewP1nPqjEnGfPpMhVkXaG9O/view?usp=sharing>
